# Supplementary material
Source: publisher figshare collection journal article supplement (https://gsajournals.figshare.com/ndownloader/files/18045092)
Supplement: Supplementary file 1 [file 18045092]

## Sheet: Table S7
Table S7: Summary of recovery using Pindel of deletions 1-1000bp in size for computationally generated genomes.
Chr	Modeled	Seen	% Seen
X	58	34	0.586207
2L	65	47	0.723077
2R	71	31	0.43662
3L	93	55	0.591398
3R	87	46	0.528736
Total	374	213	0.569519
